# Supplementary material
Source: PubMed Central journal article supplement (PMC4270375)
Supplement: bi501396v_si_001.pdf [file bi501396v_si_001.pdf]

# Comparative Characterization of the Lactimidomycin and iso-Migrastatin Biosynthetic Machineries Revealing Unusual Features for Acyltransferase-less Type I Polyketide Synthases and Providing An Opportunity to Engineer New Analogues

Jeong-Woo Seo,<sup>†,\*,‡</sup> Ming Ma,<sup>‡,‡</sup> Thomas Kwong,<sup>‡,‡</sup> Jianhua Ju,<sup>†,‡</sup> Si-Kyu Lim,<sup>†,‡</sup> Hui Jiang,<sup>†,‡</sup> Jeremy R. Lohman,<sup>‡</sup> Chunying Yang,<sup>§,‡</sup> John Cleveland,<sup>§,‡</sup> Emmanuel Zazopoulos,<sup>#</sup> Chris M. Farnet,<sup>#</sup> and Ben Shen<sup>\*,†,‡,‡,‡,‡</sup>

<sup>†</sup>Division of Pharmaceutical Sciences, University of Wisconsin-Madison, Madison, Wisconsin 53705, USA; <sup>‡</sup>Department of Chemistry, <sup>§</sup>Department of Cancer Biology, <sup>‡</sup>Department of Molecular Therapeutics, and <sup>‡</sup>Natural Products Library Initiative at The Scripps Research Institute, The Scripps Research Institute, Jupiter, Florida 33458, USA; and <sup>#</sup>Thallion Pharmaceuticals, Inc., Montreal, Quebec H4S 2C8, Canada

<sup>‡</sup>These authors contributed equally.

To whom correspondence should be addressed: [shenb@scripps.edu](mailto:shenb@scripps.edu)

Present Addresses: <sup>\*</sup>Biorefinery Research Center, Jeonbuk Branch Institute, Korea Research Institute of Bioscience and Biotechnology (KRIBB), 181 Ipsin-gil, Jeongeup, Jeonbuk 580-185, Korea; <sup>†</sup>South China Sea Institute of Oceanology, Chinese Academy of Sciences, 164 West Xingang Road, Guangzhou 510301, China; <sup>‡</sup>Research and Development Center, GenoTech Co. Ltd., Daejeon 305-343, Korea; and <sup>‡</sup>College of Life Sciences, Zhejiang University, 866 Yuhangtang Road, Hangzhou, Zhejiang, 310058, China; <sup>‡</sup>Department of Tumor Biology, The Moffitt Cancer Center & Research Institute, 12902 Magnolia Drive, MRC, Tampa, FL 33612, USA.

## Supporting Information

|                    |                                                                                                                                               |     |
|--------------------|-----------------------------------------------------------------------------------------------------------------------------------------------|-----|
| <b>Table S1.</b>   | Bacterial strains and plasmids used in this study                                                                                             | S2  |
| <b>Table S2.</b>   | Oligonucleotide primers used in this study                                                                                                    | S3  |
| <b>Table S3.</b>   | <sup>1</sup> H (700 MHz) and <sup>13</sup> C (175 MHz) NMR data for <b>16</b> and <b>17</b>                                                   | S4  |
| <b>Figure S1.</b>  | H <sub>2</sub> O-mediated ring expansion and ring opening rearrangements of <b>2</b> to <b>3</b> and <b>4-6</b>                               | S5  |
| <b>Figure S2.</b>  | Comparison between <b>1</b> and <b>2</b> biosynthesis                                                                                         | S6  |
| <b>Figure S3.</b>  | Construction of the mutants SB15001 ( <i>AltM<sub>E</sub></i> ), SB15005 ( <i>AltM<sub>H</sub></i> ), and SB15002 ( <i>AltM<sub>K</sub></i> ) | S8  |
| <b>Figure S4.</b>  | Construction of recombinant strains SB15006 ( <i>AltM<sub>K</sub>/mgsK</i> ) and SB15007 ( <i>AltM<sub>K</sub>/mgsJK</i> )                    | S10 |
| <b>Figure S5.</b>  | Cytotoxicity assay of <b>15</b> and <b>16</b> in comparison with <b>1</b> , <b>2</b> , and selected congeners                                 | S11 |
| <b>Figure S6.</b>  | <sup>1</sup> H (700 MHz) and <sup>13</sup> C (175 MHz) NMR spectra of <b>14</b> in CDCl <sub>3</sub>                                          | S12 |
| <b>Figure S7.</b>  | <sup>1</sup> H (700 MHz) and <sup>13</sup> C (175 MHz) NMR spectra of <b>16</b> in CDCl <sub>3</sub>                                          | S13 |
| <b>Figure S8.</b>  | HSQC and HMBC spectra of <b>16</b> in CDCl <sub>3</sub>                                                                                       | S14 |
| <b>Figure S9.</b>  | <sup>1</sup> H (700 MHz) and <sup>13</sup> C (175 MHz) NMR spectra of <b>17</b> in CDCl <sub>3</sub>                                          | S15 |
| <b>Figure S10.</b> | HSQC and HMBC spectra of <b>17</b> in CDCl <sub>3</sub>                                                                                       | S16 |
| <b>References</b>  |                                                                                                                                               | S17 |

**Table S1.** Bacterial strains and plasmids used in this study

| Plasmids<br>/Strains             | Relevant characteristics                                                                                                                        | References |
|----------------------------------|-------------------------------------------------------------------------------------------------------------------------------------------------|------------|
| <i>Plasmids</i>                  |                                                                                                                                                 |            |
| pWHM79                           | pGEM-3zf-derived plasmid with the <i>ErmE</i> * promoter                                                                                        | 1          |
| pHZ1358                          | <i>E. coli-Streptomyces</i> shuttle vector (a high-copy-number vector derived from the pIJ101 origin of replicon)                               | 2          |
| pIJ773                           | Plasmid carrying the 1398-bp Redirect cassette [ <i>aac(3)IV</i> and <i>oriT</i> flanked by FRT sites] as an EcoRI/HindIII insert               | 3          |
| pKC1139                          | <i>E. coli-Streptomyces</i> shuttle vector (a temperature sensitive vector derived from the pSG5 <sup>TS</sup> origin of replicon)              | 4          |
| pKC1218                          | <i>E. coli-Streptomyces</i> shuttle vector (a low-copy-number vector derived from the SCP2* origin of replicon)                                 | 4          |
| pSET152                          | <i>E. coli-Streptomyces</i> shuttle vector that integrates into <i>att</i> site of <i>Streptomyces</i> chromosome                               | 4          |
| pBS3031                          | <i>E. coli-Streptomyces</i> shuttle vector (a high-copy-number vector derived from the pIJ101 origin of replicon)                               | 5          |
| pBS11016                         | pSET152-derived integrative vector with <i>neo</i> resistance gene replaced <i>aac(3)IV</i> gene                                                | 6          |
| pBS15001                         | SuperCos1-derived cosmid carrying the upstream part of <i>ltm</i> cluster                                                                       | This study |
| pBS15002                         | SuperCos1-derived cosmid carrying the central region of <i>ltm</i> cluster                                                                      | This study |
| pBS15003                         | SuperCos1-derived cosmid carrying the downstream part of <i>ltm</i> cluster                                                                     | This study |
| pBS15004                         | pBS15001-derived cosmid with the KS domain of PKS module-2 encoding region of <i>ltmE</i> replaced by the Redirect cassette                     | This study |
| pBS15005                         | pBS15003-derived cosmid with <i>ltmK</i> replaced by the Redirect cassette                                                                      | This study |
| pBS15006                         | pWHM79-derived plasmid carrying the 2.5-kb SacI-MscI <i>ltmK</i> fragment                                                                       | This study |
| pBS15007                         | pBS11016-derived plasmid with the 3.0-kb <i>ltmK</i> fragment from pBS15006 cloned into EcoRV site                                              | This study |
| pBS15008                         | pBS15003-derived cosmid with <i>ltmH</i> replaced by the Redirect cassette                                                                      | This study |
| pBS11006                         | SuperCos1-derived cosmid carrying the downstream part of <i>Streptomyces platensis</i> isomigrastatin gene cluster                              | 7          |
| pBS15009                         | pBS11016-derived plasmid carrying the <i>mgsIJK</i> fragment from pBS11006 cloned into EcoRV and XbaI sites                                     | This study |
| pBS15010                         | pBS15009-derived plasmid carrying the <i>mgsK</i> fragment                                                                                      | This study |
| pBS15011                         | pBS15009-derived plasmid carrying the <i>mgsJK</i> fragment                                                                                     | This study |
| <i>E. coli strains</i>           |                                                                                                                                                 |            |
| BW25113                          | Host, expressing recombination promoting proteins from pIJ790, used for the Redirect                                                            | 3          |
| /pIJ790                          | PCR-targeting mutagenesis system                                                                                                                |            |
| DH5 $\alpha$                     | General cloning host                                                                                                                            | 8          |
| ET12567                          | Methylation-deficient host, expressing transfer functions from pUZ8002, used for <i>E.</i>                                                      | 9          |
| /pUZ8002                         | <i>coli-Streptomyces</i> intergeneric conjugation                                                                                               |            |
| S17-1                            | Methylation-proficient host used for <i>E. coli-Streptomyces</i> intergeneric conjugation                                                       | 9          |
| <i>S. amphibiosporus strains</i> |                                                                                                                                                 |            |
| ATCC 53964                       | Wild-type strain of <i>S. amphibiosporus</i> , LTM producing                                                                                    | 10         |
| SB15001                          | $\Delta$ <i>ltmE</i> mutant with the KS domain of PKS module-2 encoding region of <i>ltmE</i> replaced by the Redirect cassette (from pBS15004) | This study |
| SB15002                          | $\Delta$ <i>ltmK</i> mutant with <i>ltmK</i> replaced by the Redirect cassette (from pBS15005)                                                  | This study |
| SB15003                          | SB15002/pBS15007, restored production of LTM at level comparable to the wild-type <i>S. amphibiosporus</i>                                      | This study |
| SB15004                          | Wild-type <i>S. amphibiosporus</i> with pBS15007, producing similar titers of LTM analogs comparable to wild-type strain                        | This study |
| SB15005                          | $\Delta$ <i>ltmH</i> mutant with <i>ltmH</i> replaced by the Redirect cassette (from pBS15008)                                                  | This study |
| SB15006                          | SB15002/pBS15010, producing two new compounds <b>16</b>                                                                                         | This study |
| SB15007                          | SB15002/pBS15011, producing one new compounds <b>16</b> and <b>17</b>                                                                           | This study |

**Table S2.** Oligonucleotide primers used in this study

| Oligonucleotide                                                            | Sequence (DNA sequence identical to the Redirect cassette are underlined) | Function                                                       |
|----------------------------------------------------------------------------|---------------------------------------------------------------------------|----------------------------------------------------------------|
| For gene inactivation by $\lambda$ -RED-mediated PCR-targeting mutagenesis |                                                                           |                                                                |
| ltmE-KS1-F1                                                                | 5'-GCCGCCGACGGCGCGGCCGGCGGCCCGGTG<br>GACGGGCAGATTCCGGGGATCGTCGACC-3'      | Forward primer for <i>ltmE</i> redirect mutagenesis            |
| ltmE-KS1-R1                                                                | 5'-CGCCTCCGCGTCCGTGACCTCCGCCGCGTGT<br>GTAGGCTGGAGCTGCTTC-3'               | Reverse primer for <i>ltmE</i> redirect mutagenesis            |
| ltmK-F1                                                                    | 5'-GTGACCACCCACCTCACCACCGACATCGACGA<br>GATCGTCATTCCGGGGATCCGTCCGACC-3'    | Forward primer for <i>ltmK</i> redirect mutagenesis            |
| ltmK-R1                                                                    | 5'-CGCCGGGGTGAGCCACATCGGGATGCGGGCG<br>TAGCCGCGTGTAGGCTGGAGCTGCTTC-3'      | Reverse primer for <i>ltmK</i> redirect mutagenesis            |
| ltmH-F1                                                                    | 5'-ATGGAGGCGGTCTCTTTCCCGGGCAGGGCG<br>CGCAGCGATTCCGGGGATCCGTCCGACC-3'      | Forward primer for <i>ltmH</i> redirect mutagenesis            |
| ltmH-R1                                                                    | 5'-GGTGCGGGCGGCCAGGGCGCGTTCCTCCGC<br>GGGGGCGAATGTAGGCTGGAGCTGCTTC-3'      | Reverse primer for <i>ltmH</i> re-direct mutagenesis           |
| For sequencing or PCR amplification of probes for Southern analysis        |                                                                           |                                                                |
| ltmE-KS1-F2                                                                | 5'-GCTGTCCCCCTGTACGTCGTCGACCGG-3'                                         | Forward primer for <i>ltmE</i>                                 |
| ltmE-KS1-R2                                                                | 5'-GCAGCCGCTCCTCGTCGTCGGCG-3'                                             | Reverse primer for <i>ltmE</i>                                 |
| ltmK-F2                                                                    | 5'-GCACCGGACCGGACCGTCCGG-3'                                               | Forward primer for <i>ltmK</i>                                 |
| ltmK-R2                                                                    | 5'-GTCCAAGTCGGAGACGGAGACG-3'                                              | Reverse primer for <i>ltmK</i>                                 |
| ltmH-F2                                                                    | 5'-TACGGACTCGACTCGATCTT-3'                                                | Forward primer for <i>ltmH</i>                                 |
| ltmH-R2                                                                    | 5'-GATGATGTCCACGTAGTAGGC-3'                                               | Reverse primer for <i>ltmH</i>                                 |
| Apra-F                                                                     | 5'-ATTCCGGGGATCCGTCCGACC-3'                                               | Forward primer for <i>aac(3)IV</i>                             |
| Apra-R                                                                     | 5'-TGTAGGCTGGAGCTGCTTC-3'                                                 | Reverse primer for <i>aac(3)IV</i>                             |
| For sequencing or PCR amplification for construction of pBS15009           |                                                                           |                                                                |
| ErmE*-F1                                                                   | 5'-GTTAACGGTACCGCGAGTGTCCGTTTCG-3'                                        | Forward primer for <i>ErmE*</i> at the upstream of <i>mgsI</i> |
| ErmE*-R1                                                                   | 5'-TCTAGATACGTAGCTGGATCCTACCA-3'                                          | Reverse primer for <i>ErmE*</i> at the upstream of <i>mgsI</i> |
| mgsI-F                                                                     | 5'-TACGTAGACATCCCACCGCAGTCG-3'                                            | Forward primer for <i>mgsI</i>                                 |
| mgsI-R                                                                     | 5'-TCTAGACTTAAGGCAGGGCGTGGTG-3'                                           | Reverse primer for <i>mgsI</i>                                 |
| ErmE*-F2                                                                   | 5'-CTTAAGGCGAGTGTCCGTTTCG-3'                                              | Forward primer for <i>ErmE*</i> at the upstream of <i>mgsJ</i> |
| ErmE*-R2                                                                   | 5'-TGTACATACGTAGCTGGATCCTACCA-3'                                          | Reverse primer for <i>ErmE*</i> at the upstream of <i>mgsJ</i> |
| mgsJ-F                                                                     | 5'-TACGTAGGTTTACCAGACAG-3'                                                | Forward primer for <i>mgsJ</i>                                 |
| mgsJ-R                                                                     | 5'-TGTACATCTAGAGTTTAAACGGCGCCACCTCGTTTCG-3'                               | Reverse primer for <i>mgsJ</i>                                 |
| ErmE*-F3                                                                   | 5'-GTTTAAACGCGAGTGTCCGTTTCG-3'                                            | Forward primer for <i>ErmE*</i> at the upstream of <i>mgsK</i> |
| ErmE*-R3                                                                   | 5'-TTAATTAATACGTAGCTGGATCCTACCA-3'                                        | Reverse primer for <i>ErmE*</i> at the upstream of <i>mgsK</i> |
| mgsK-F                                                                     | 5'-TACGTAGCACCCACCGATG-3'                                                 | Forward primer for <i>mgsK</i>                                 |
| mgsK-R                                                                     | 5'-TTAATTAATCTAGATGTACAGTCATGACCGCCTG-3'                                  | Reverse primer for <i>mgsK</i>                                 |

**Table S3.**  $^1\text{H}$  (700 MHz) and  $^{13}\text{C}$  (175 MHz) NMR data for 8,9-dihydro-8*R*-hydroxy-LTM (**16**) and 8,9-dihydro-8*R*-methoxy-LTM (**17**) in  $\text{CDCl}_3$ <sup>a</sup>

| position           | 8,9-dihydro-8 <i>R</i> -hydroxy-LTM ( <b>16</b> ) |                                       | 8,9-dihydro-8 <i>R</i> -methoxy-LTM ( <b>17</b> ) |                                       |
|--------------------|---------------------------------------------------|---------------------------------------|---------------------------------------------------|---------------------------------------|
|                    | $\delta_{\text{C}}$ , type                        | $\delta_{\text{H}}$ ( <i>J</i> in Hz) | $\delta_{\text{C}}$ , type                        | $\delta_{\text{H}}$ ( <i>J</i> in Hz) |
| 1                  | 167.7 C                                           |                                       | 167.8 C                                           |                                       |
| 2                  | 125.0 CH                                          | 5.70 d (15.9)                         | 124.8 CH                                          | 5.70 d (15.9)                         |
| 3                  | 150.3 CH                                          | 6.66 m                                | 150.4 CH                                          | 6.66 m                                |
| 4                  | 30.6 CH <sub>2</sub>                              | 2.46 m*, 2.19 m                       | 30.6 CH <sub>2</sub>                              | 2.44 m, 2.23 m                        |
| 5                  | 32.0 CH <sub>2</sub>                              | 2.56 m*, 1.98 m*                      | 32.2 CH <sub>2</sub>                              | 2.58 m*, 2.03 m                       |
| 6                  | 125.8 CH                                          | 5.65 m                                | 127.5 CH                                          | 5.55 m                                |
| 7                  | 138.4 CH                                          | 5.49 dd (15.6, 3.8)                   | 134.5 CH                                          | 5.27 dd (15.8, 4.4)                   |
| 8                  | 68.9 CH                                           | 4.14 m*                               | 78.4 CH                                           | 3.54 m                                |
| 9                  | 42.2 CH <sub>2</sub>                              | 2.00 m*, 1.48 m                       | 40.7 CH <sub>2</sub>                              | 1.96 m, 1.48 m                        |
| 10                 | 33.7 CH                                           | 1.79 m*                               | 33.7 CH                                           | 1.79 m*                               |
| 11                 | 82.0 CH                                           | 5.20 d (4.2)                          | 82.1 CH                                           | 5.19 d (4.4)                          |
| 12                 | 134.1 C                                           |                                       | 134.1 C                                           |                                       |
| 13                 | 128.5 CH                                          | 5.36 d (9.4)                          | 128.3 CH                                          | 5.36 br d (9.7)                       |
| 14                 | 46.6 CH                                           | 3.44 m                                | 46.5 CH                                           | 3.43 m                                |
| 15                 | 212.1 C                                           |                                       | 212.2 C                                           |                                       |
| 16                 | 47.3 CH <sub>2</sub>                              | 2.58*                                 | 47.3 CH <sub>2</sub>                              | 2.57 d (5.7)                          |
| 17                 | 64.8 CH                                           | 4.12 m*                               | 64.8 CH                                           | 4.11 m                                |
| 18                 | 40.7 CH <sub>2</sub>                              | 1.61 m, 1.35 m                        | 40.7 CH <sub>2</sub>                              | 1.62 m, 1.34 m                        |
| 19                 | 27.1 CH                                           | 2.50 m*                               | 27.1 CH                                           | 2.50 m                                |
| 20                 | 38.4 CH <sub>2</sub>                              | 2.78 m*, 2.35 m*                      | 38.4 CH <sub>2</sub>                              | 2.79 m*, 2.34 m*                      |
| 21                 | 172.2 C                                           |                                       | 172.0 C                                           |                                       |
| 22                 | 17.4 CH <sub>3</sub>                              | 0.93 d (6.9)                          | 17.3 CH <sub>3</sub>                              | 0.93 d (7.0)                          |
| 23                 | 15.0 CH <sub>3</sub>                              | 1.78 s                                | 15.0 CH <sub>3</sub>                              | 1.77 d (1.3)                          |
| 24                 | 16.1 CH <sub>3</sub>                              | 1.19 d (6.8)                          | 16.1 CH <sub>3</sub>                              | 1.19 d (6.8)                          |
| 25                 | 37.1 CH <sub>2</sub>                              | 2.78 m*, 2.35 m*                      | 37.1 CH <sub>2</sub>                              | 2.79 m*, 2.34 m*                      |
| 26                 | 172.1 C                                           |                                       | 171.9 C                                           |                                       |
| NH                 |                                                   | 8.17 s                                |                                                   | 7.95 s                                |
| 8-OCH <sub>3</sub> |                                                   |                                       | 56.5 CH <sub>3</sub>                              | 3.29 s                                |

<sup>a</sup>Assignments were based on COSY, HSQC and HMBC.

\*Signals overlapped with others.

**Figure S1.** Migrastatin (**3**) and dorrigocins (**4-6**) are shunt metabolites of iso-migrastatin (**2**), and H<sub>2</sub>O-mediated ring expansion and ring opening rearrangements of **2** to **3** and **4-6**, respectively.<sup>6</sup>

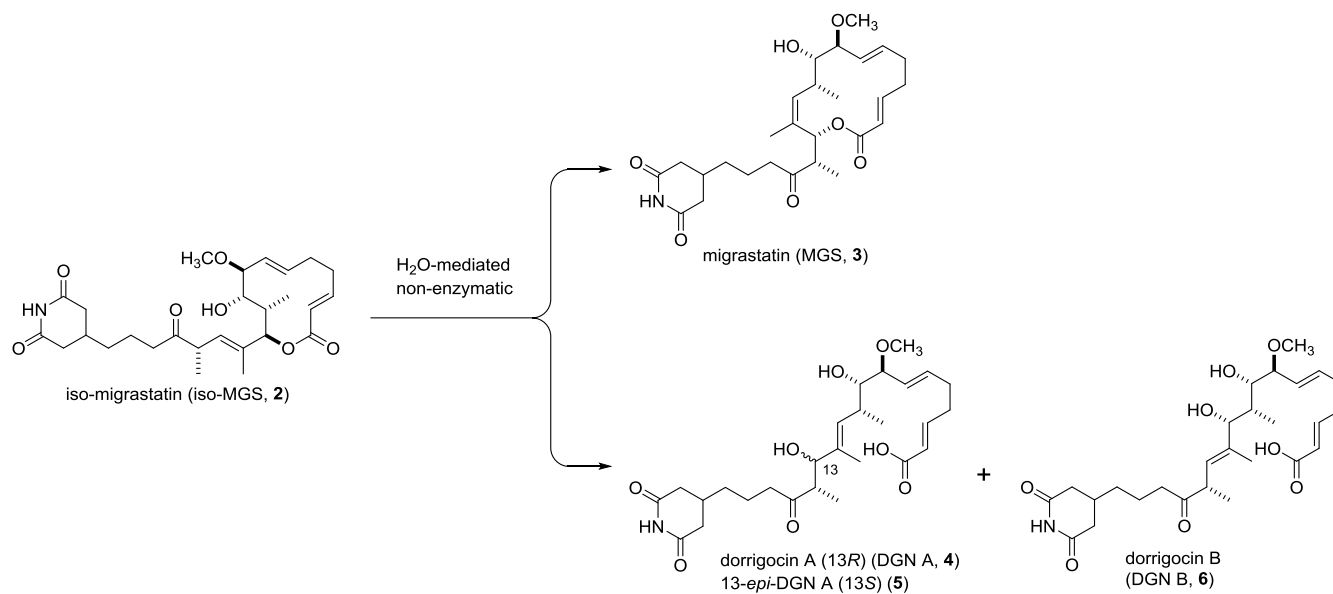

**Figure S2.** Comparison between LTM biosynthesis in *S. amphibiosporus* ATCC 53964 and iso-MGS biosynthesis in *S. platensis* NRRL 18993. (A) The *ltm* cluster consists of nine genes, while the *mgs* cluster consists of 11 genes. The two clusters show a highly conserved genetic organization. Homologs for eight of the genes are found in both clusters. The dashed lines depict homologues. (B) Domain and module organization of the LTM and iso-MGS type I AT-less PKSs. Except modules 8 and 9, the two PKSs have an identical domain and module organization and architecture. (C) The iso-MGS AT-less type I PKS biosynthesizes 8-desmethoxy-16,17-didehydro-iso-MGS (**12**) (>95%) and 8-desmethoxy-17*R*-hydroxy-iso-MGS (**13**) (<5%) as the nascent products and the three tailoring enzymes MgsIJK possess remarkable substrate promiscuity, accounting for the formation of all congeners of **2** known to *S. platensis* NRRL 18993 from **12** and **13**. (D) Sequence alignment of LtmK with selected bacterial cytochrome P450 enzymes. The conserved oxygen activation motif is shown in black box and the heme binding motif including the binding cysteine is shown in green box. The accession numbers are: LtmK (ACY01404), PldB (BAH02272), CYP107L3 (AAT45281), MgsK (ACY01396), and CYP199A4 (4EGP\_A). Abbreviations are: ACP, acyl carrier protein; AMT, amidotransferase; B, branching; DH, dehydratase; ER, enoylreductase; KR, ketoreductase; KS, ketosynthase; MT, methyltransferase; TE, thioesterase. Green ovals depict AT-docking domains. The yellow domains highlight the missing domains for the iso-MGS AT-less type I PKS to synthesize both 8-desmethoxy-16,17-didehydro-iso-MGS (**12**) and 8-desmethoxy-17*R*-hydroxy-iso-MGS (**13**) as nascent products and refer Figure 3B for comparison to the LTM AT-less type I PKS that biosynthesizes 8,9-dihydro-LTM (**14**) as the sole nascent product.

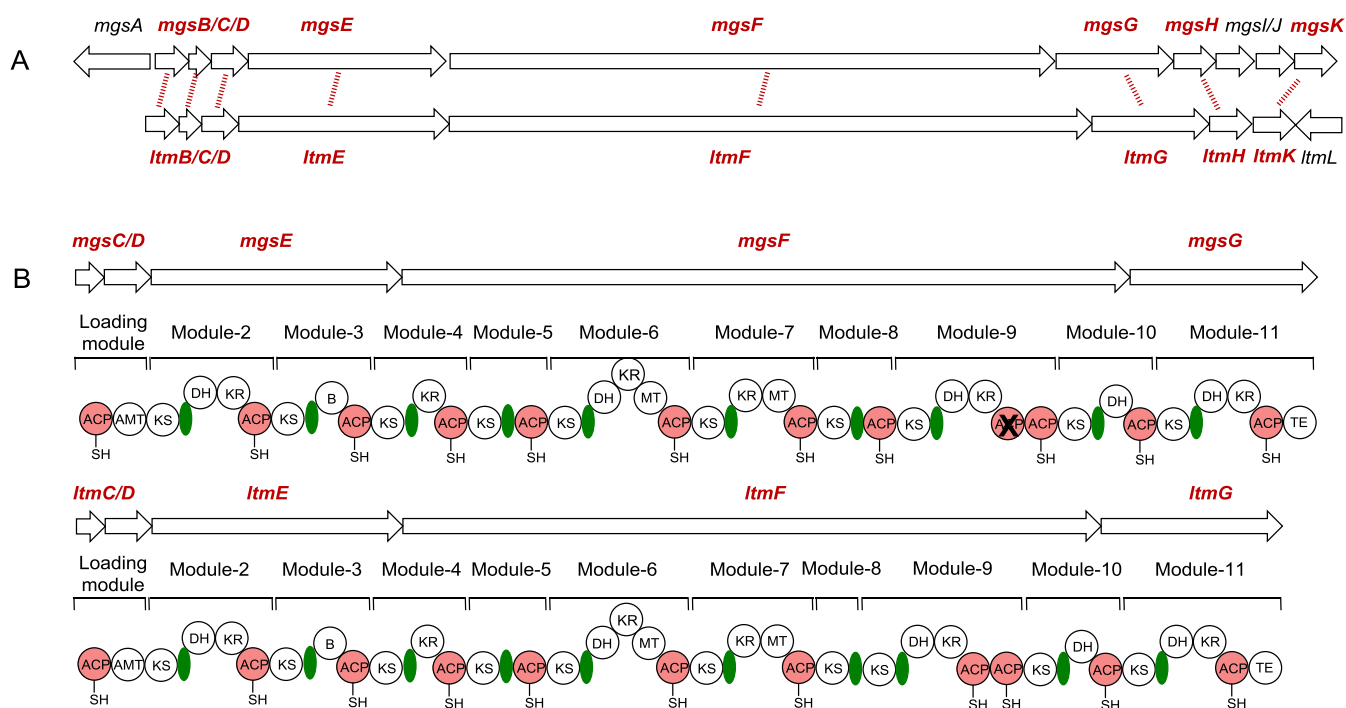

C

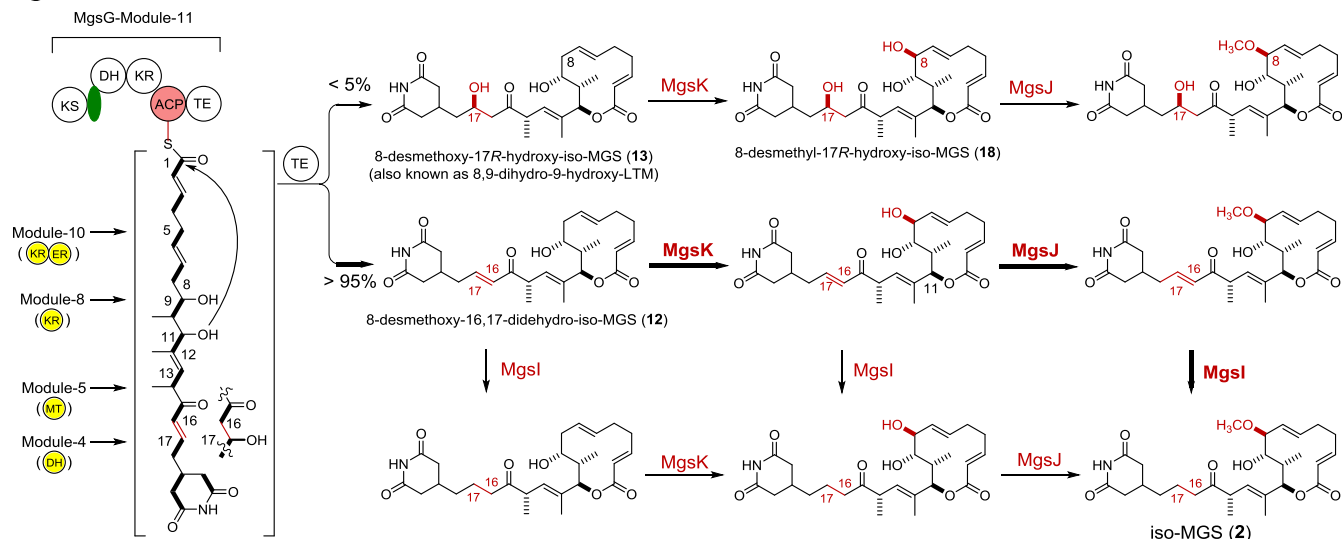

D

|           | 1           | 10            | 20           | 30          | 40           | 50               | 60         | 70                | 80             |
|-----------|-------------|---------------|--------------|-------------|--------------|------------------|------------|-------------------|----------------|
| LtnK      | MRGHAVTTHL  | TTTIDEIVTDF   | QSTEGKKN     | PPYLYRRL    | QELGQVHRSEQL | -GMYATGYEVC      | SARLRDP    | PRVIKGP           | EQIQI          |
| P1dB      | MDLETQLL    | SPAYLRNPH     | LNAA---      | LSADPVQ     | RAYASGGL     | SYVYVTRY         | EDVRALL    | ADSRGK            | GYTLRI         |
| CYP107L3  | MSEDRIYDL   | AALGEEFT      | RDPHPVYAE    | ---LRARGP   | VHRVRL       | PEGFEAW          | VVGYEAA    | RARAL             | SDPLSN---      |
| MgsK      | MTGPTDGG    | IPAFPEPRT     | CPYRLPAE     | YNGLR       | ESGPVSK      | VILPTGK          | PAWIL      | TRYDDVR           | KALLD          |
| CYP199A4  | MISNSSAES   | ISAPPNDST     | IPHLAIDP     | SFLDFFD     | PYPDQQT      | LRDAGP           | VYYLDK     | MNVYGV            | ARYAEVH        |
| Consensus | .....P..... | P.....S.....  | pyp..r.l...  | g.v.....    | u.vtrY..     | v.aal..          | Op.....    |                   |                |
|           | 88          | 97            | 107          | 117         | 127          | 137              | 147        | 157               | 167            |
| LtnK      | PAEHSAR     | ----LLRGT     | MHRLDPP      | DHTRLR      | RLVNGA       | FTPRSYA          | ALEPD      | IQELID            | DLITPA         |
| P1dB      | NAGDDE      | ISQFTD        | SLTEH        | LNSDPP      | DHTRLR       | RLVNGA           | FTAGRI     | EQLRPR            | ITEIVN         |
| CYP107L3  | DEGDP       | -----         | AAAPH        | LISDPP      | RHTRLR       | RLVYKE           | FTPRRI     | EALGPR            | VREITD         |
| MgsK      | ELARSDK     | -----         | DSTLS        | LAGMD       | APETRAR      | AVYGE            | FTFRME     | ALRPRV            | QEIYD          |
| CYP199A4  | KEKPH       | -----         | RPPSL        | LILEAD      | PPAHT        | RPRAVL           | SKVLS      | PATHTK            | ITRDG          |
| Consensus | .....l..    | Dp.HTR.       | Rr.v.k.ftpr. | n.alrp...   | e..D..       | vd..l.....       | D.....     | afp.p.            |                |
|           | 175         | 184           | 194          | 204         | 214          | 224              | 234        | 244               | 254            |
| LtnK      | RMLGVP      | ASDWH         | RFDVY        | LDLSS       | MYELG        | FTGDEL           | PKADA      | ADELI             | AYFRK          |
| P1dB      | ELLGVP      | SVDRSS        | FSHNS        | NVLV        | STAEV        | G-E----          | LAEGG      | AMVAY             | LAQLI          |
| CYP107L3  | ELLGVP      | YADRK         | TFHEM        | STEY        | TKRSG        | GP-R----         | AEANG      | ELAGY             | LMRL           |
| MgsK      | ELLGVP      | SVADRD        | FFEDRT       | SRML        | SMTL         | PPLT---          | RQAFF      | DLQTY             | LDL            |
| CYP199A4  | DAMGLK      | QEGRE         | HLHPY        | AGLV        | FNAG         | PPNEL            | RQT---     | AERSA             | PHQAY          |
| Consensus | ..\$Gv...   | dr..f.....    | s...pp.....  | a..a...lqay | ..el.....    | Pgddl.s..i.a.... | g...t.del  |                   |                |
|           | 262         | 271           | 281          | 291         | 301          | 311              | 321        | 331               | 341            |
| LtnK      | LLFMAG      | FETT          | THSMG        | NGM         | FALLEN       | PEQTQ            | WLRNM      | DAMP              | AVEEL          |
| P1dB      | LLSAGH      | ETT           | VNLI         | AGTL        | LLQN         | PDQL             | ARLR       | SDTL              | LLPG           |
| CYP107L3  | LLLIAGH     | ETT           | AGLIS        | NGML        | ALLRH        | PDQAL            | ALQAD      | FGLD              | GAEE           |
| MgsK      | LLLIAGH     | DTT           | SNHIS        | LGLAL       | METPE        | LARIT            | DOPGT      | PQVVE             | ELLRY          |
| CYP199A4  | SLLSAG      | LDTT          | VNGI         | GA          | AVYCL        | ARFP             | GELQ       | RLRSD             | PLARN          |
| Consensus | LLI..AG..   | #TT..n.ig.gm. | aL...P..lqr  | lr.#p.l.p.  | avEEL.Ry.    | spvq....         | r.t.e.V    | lgg.ti..ge.vl.l.. |                |
|           | 349         | 358           | 368          | 378         | 388          | 398              | 408        | 418               | 428            |
| LtnK      | DPRVFS      | DPELL         | RLDGE        | APMS        | FGGGI        | HYCLG            | AGLAR      | LEIRK             | IFTS           |
| P1dB      | DSTRFS      | ADRL          | DIGR         | PIGGS       | YVGFH        | GIHNC            | IGAPL      | ARLE              | GEIA           |
| CYP107L3  | DPGRYP      | DPGR          | DIRD         | HRGHL       | FGHGI        | HYCF             | GLAR       | LEART             | AIRT           |
| MgsK      | DPDVF       | ENPG          | KLDV         | DGR         | ARHL         | FGHGP            | HQCLG      | SLAR              | MEI            |
| CYP199A4  | DPRRW       | SDP           | LDYD         | ITRKT       | SGHVG        | FGSGV            | HMCV       | GLVAR             | LEGE           |
| Consensus | Dprrrfs     | #p.lldi.      | R...gh..     | FG.G.H.C.   | Gq.lAR       | \$E.e.....       | Llrr..ai.. | agp.....          | lrGl..lPv..ltf |

**Figure S3.** Confirmation of the cloned gene cluster encoding LTM biosynthesis and functional assignment of the *ltm* cluster in *S. amphibiosporus* ATCC 53964 by gene inactivation with  $\lambda$ -RED-mediated PCR-targeting mutagenesis followed by HPLC analysis of metabolite profiles of the resultant mutant strains. (A) Construction of the  $\Delta ltmE$  mutant strain SB15001. Restriction map showed the KS domain of PKS module-2 encoding region of *ltmE* gene was replaced by a RK2 origin of transfer (*oriT*) and apramycin resistance (*aac(3)IV*) gene cassette. The genomic DNAs isolated from resultant  $\Delta ltmE$  mutant and wild-type strain were digested by SphI and hybridized with the two PCR amplified regions as probes (the *ltmE* probe hybridizes to partial KS domain encoding region and its downstream region and the *Apra* probe hybridizes to the *aac(3)IV* region) for Southern analysis. Southern analysis for the wild-type strain (lane 1) and  $\Delta ltmE$  mutant (lane 2) using both probes showed correct fragment sizes. “S” represents SphI digestion site. (B) Construction of the  $\Delta ltmH$  mutant strain SB15005. Restriction map showed the entire *ltmH* gene was replaced by a RK2 origin of transfer (*oriT*) and apramycin resistance (*aac(3)IV*) gene cassette. The genomic DNAs isolated from resultant  $\Delta ltmH$  mutant and wild-type strain were digested by NdeI and BglII and hybridized with the PCR amplified upstream region of *ltmH* gene as a probe for Southern analysis. Southern analysis for the wild-type strain (lane 1 and 3) and  $\Delta ltmE$  mutant (lane 2 and 4) showed correct fragment sizes. “N” represents NdeI digestion site and “B” represents BglII digestion site. (C) Construction of the  $\Delta ltmK$  mutant strain SB15002. Restriction map showed the entire *ltmK* gene was replaced by a RK2 origin of transfer (*oriT*) and apramycin resistance (*aac(3)IV*) gene cassette. The genomic DNAs isolated from the resultant  $\Delta ltmK$  mutant and the wild-type strain were digested by BglII and hybridized with the two PCR amplified regions as probes (*ltmK* probe hybridizes to partial *ltmK* gene and its downstream region, *Apra* probe only hybridizes to the *aac(3)IV* region) for Southern analysis. Southern analysis for wild-type strain (lane 1) and  $\Delta ltmK$  mutant (lane 2) using both probes showed correct fragment sizes. “B” represents BglII digestion site.

A

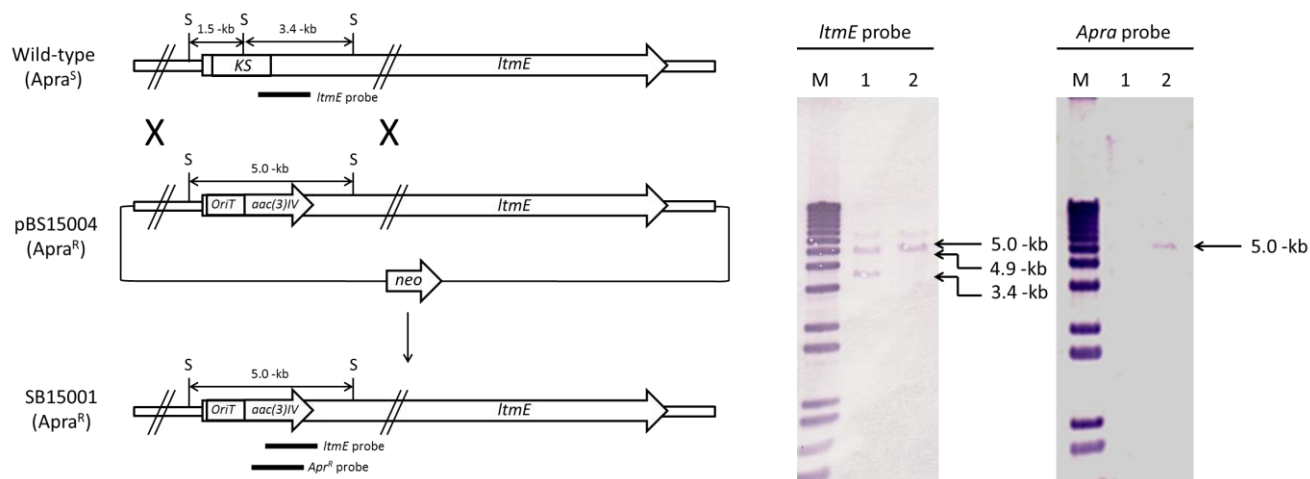

B

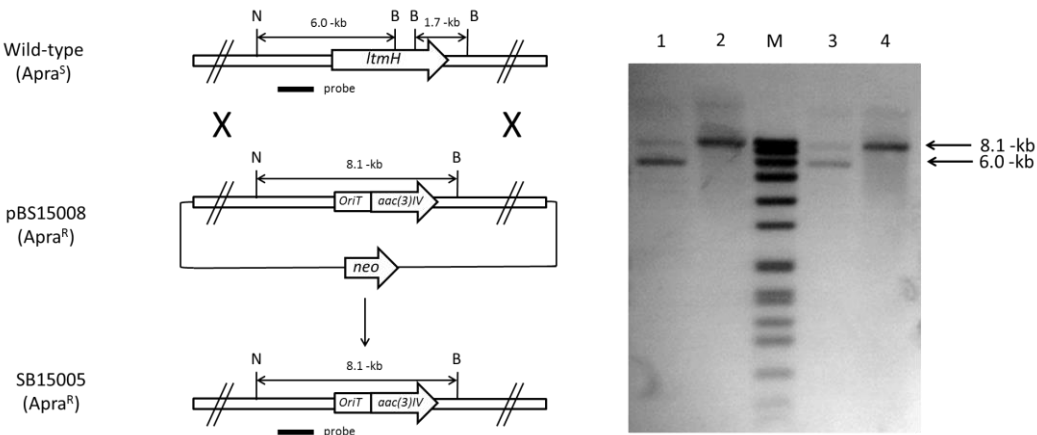

C

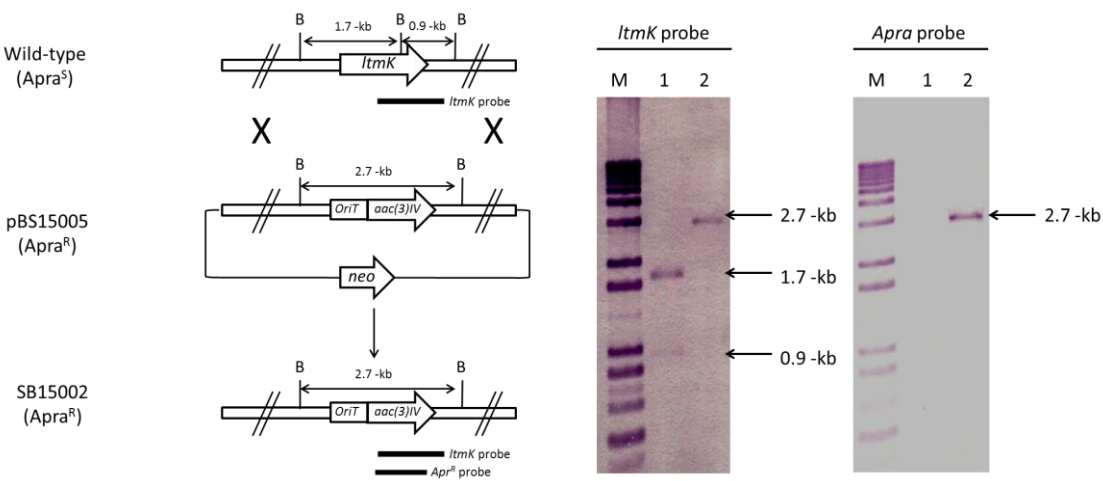

**Figure S4.** Construction of the recombinant strains SB15006 and SB15007 for production of the novel analogues **16** and **17**. The red lines show the ligation positions for constructing the expression vectors pBS15009 (*mgsIJK*), pBS15010 (*mgsK*), and pBS15011 (*mgsJK*). Introduction of pBS15010 and pBS15011 into the *AltM*K mutant strain of SB15002 yielded the recombinant strains SB15006 (*AltM*K/*mgsK*), producing **16**, and SB15007 (*AltM*K/*mgsJK*), producing **16** and **17**, respectively.

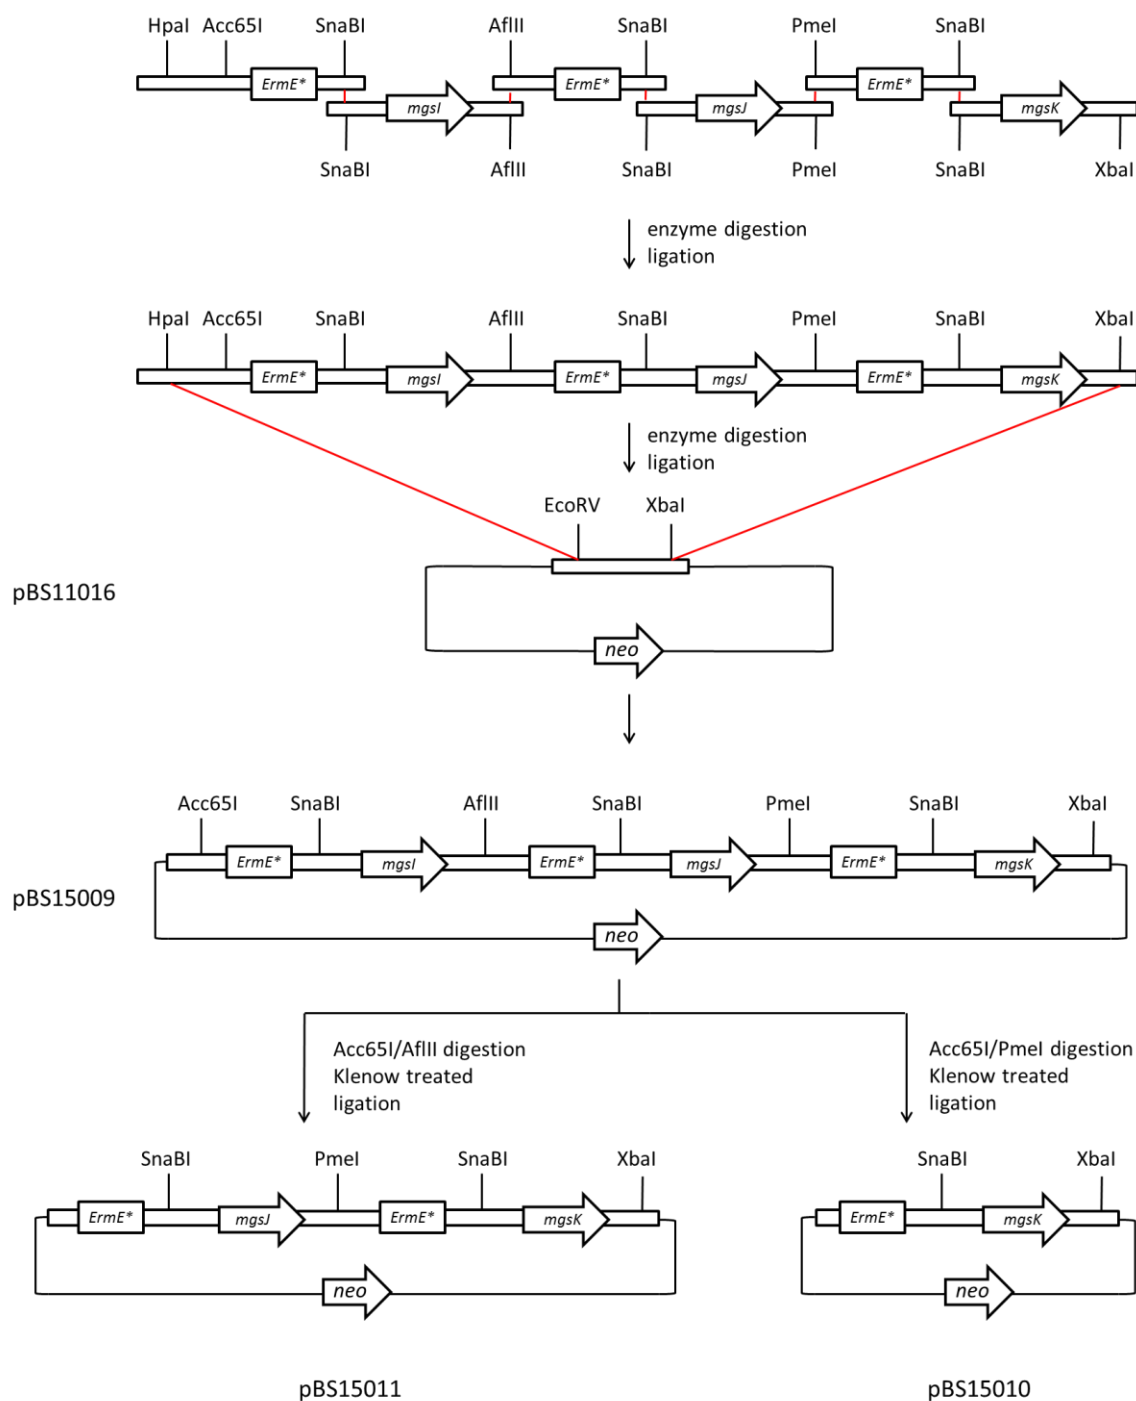

**Figure S5.** The cytotoxicity assay of **16** and **17** against MDA-MB-231, HeLa, and Jurkat cell lines in comparison with **1**, **2**, and selected congeners **13**, **15**, and **18**.

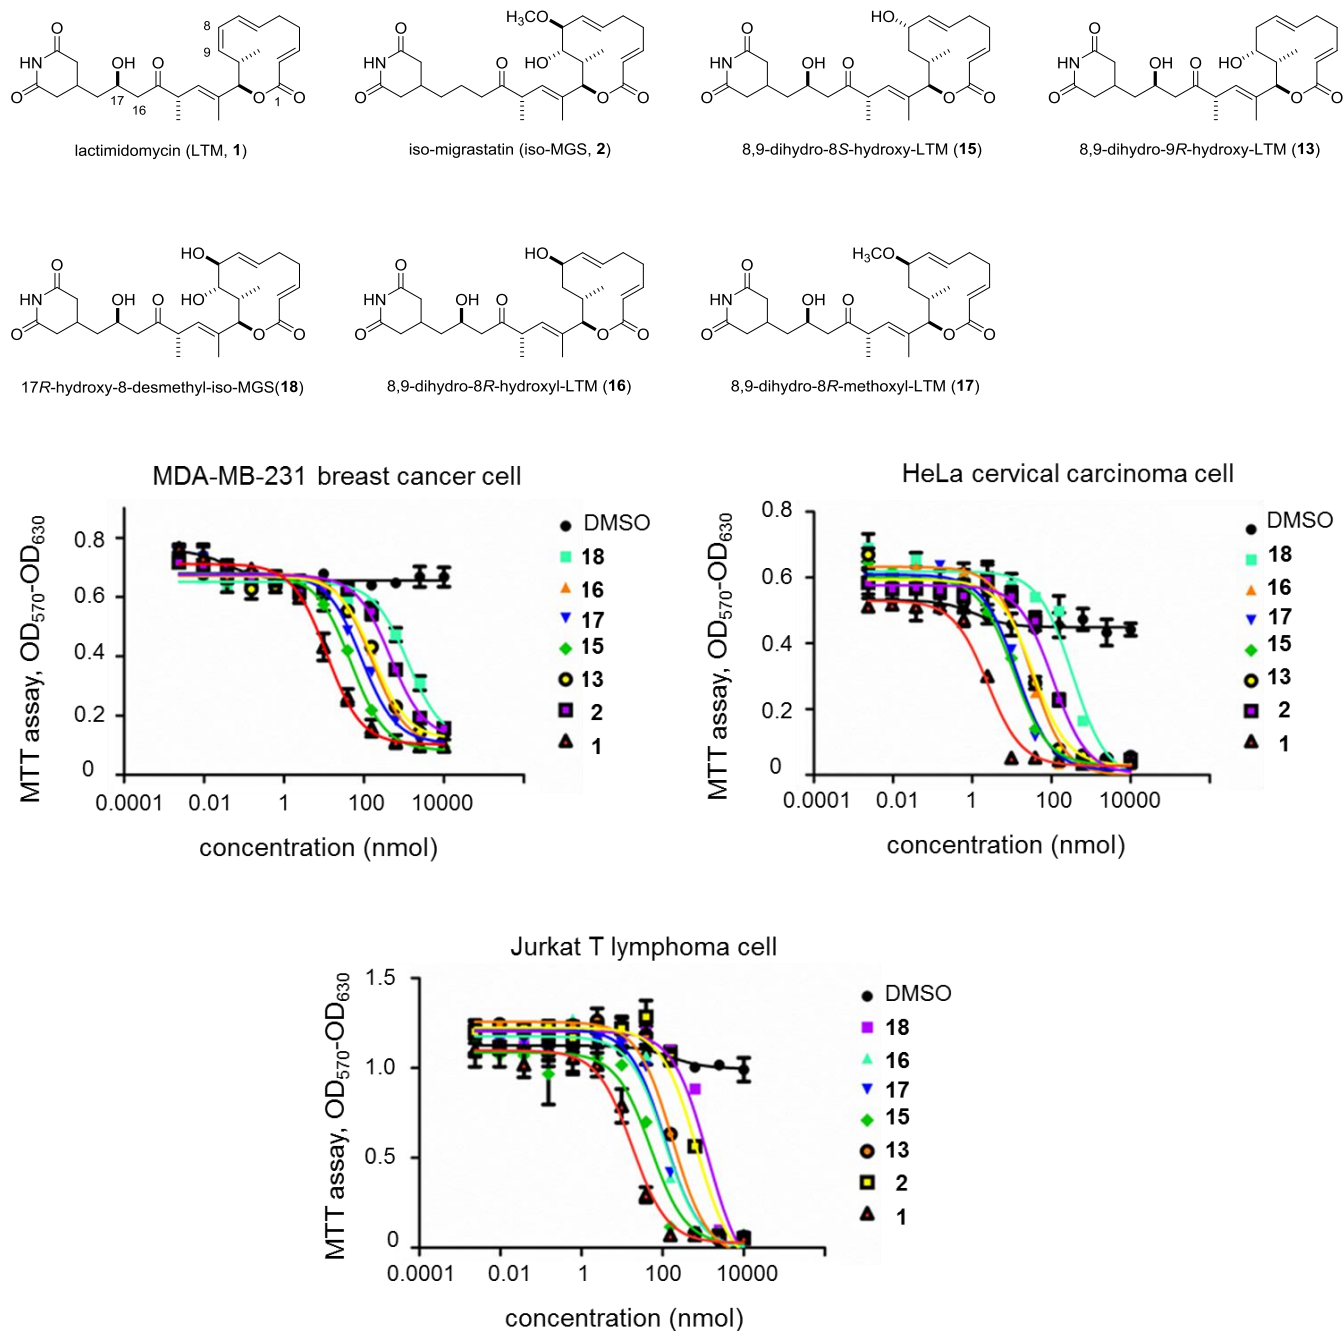

**Figure S6.**  $^1\text{H}$  (700 MHz) and  $^{13}\text{C}$  (175 MHz) NMR spectra of 8,9-dihydro-LTM (**14**) in  $\text{CDCl}_3$

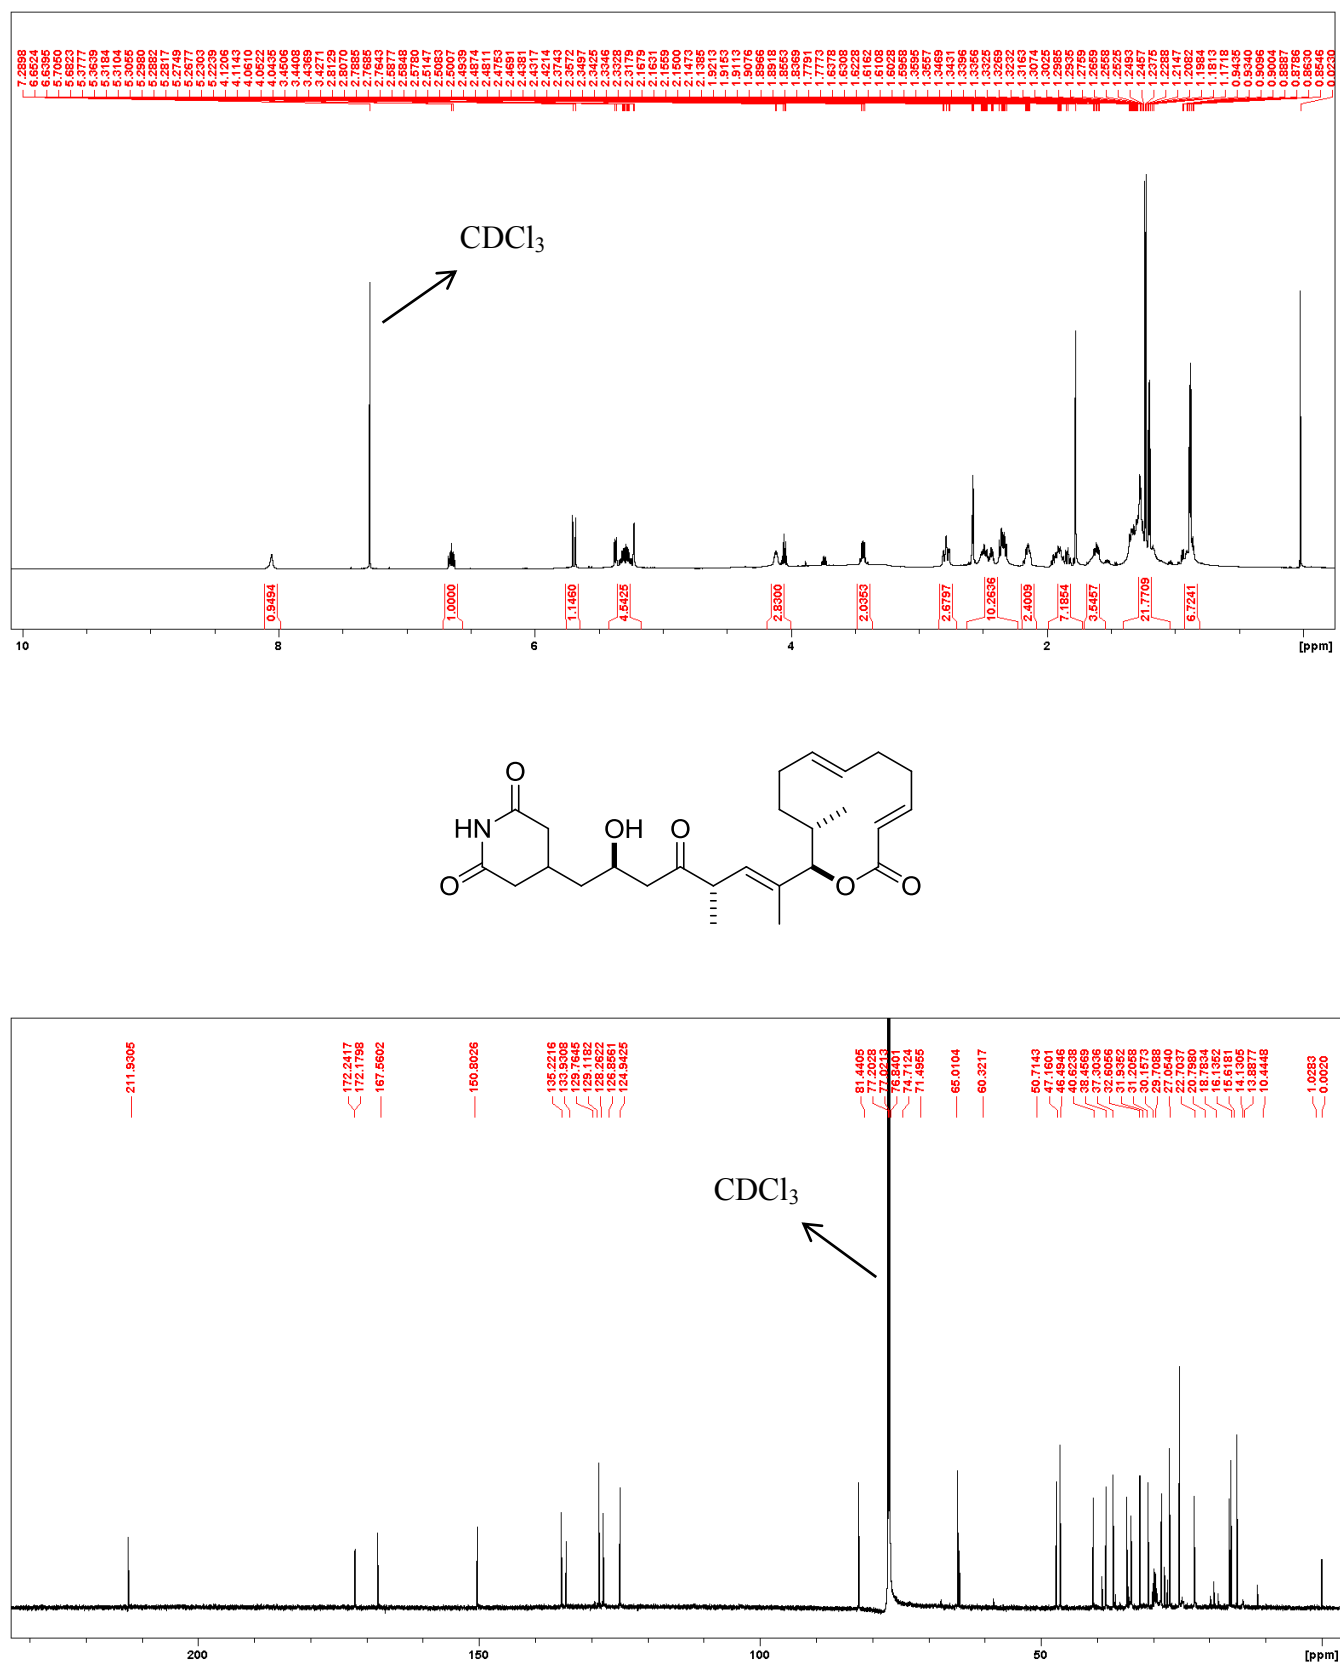

**Figure S7.**  $^1\text{H}$  (700 MHz) and  $^{13}\text{C}$  (175 MHz) NMR spectra of 8,9-dihydro-8*R*-hydroxyl-LTM (**16**) in  $\text{CDCl}_3$

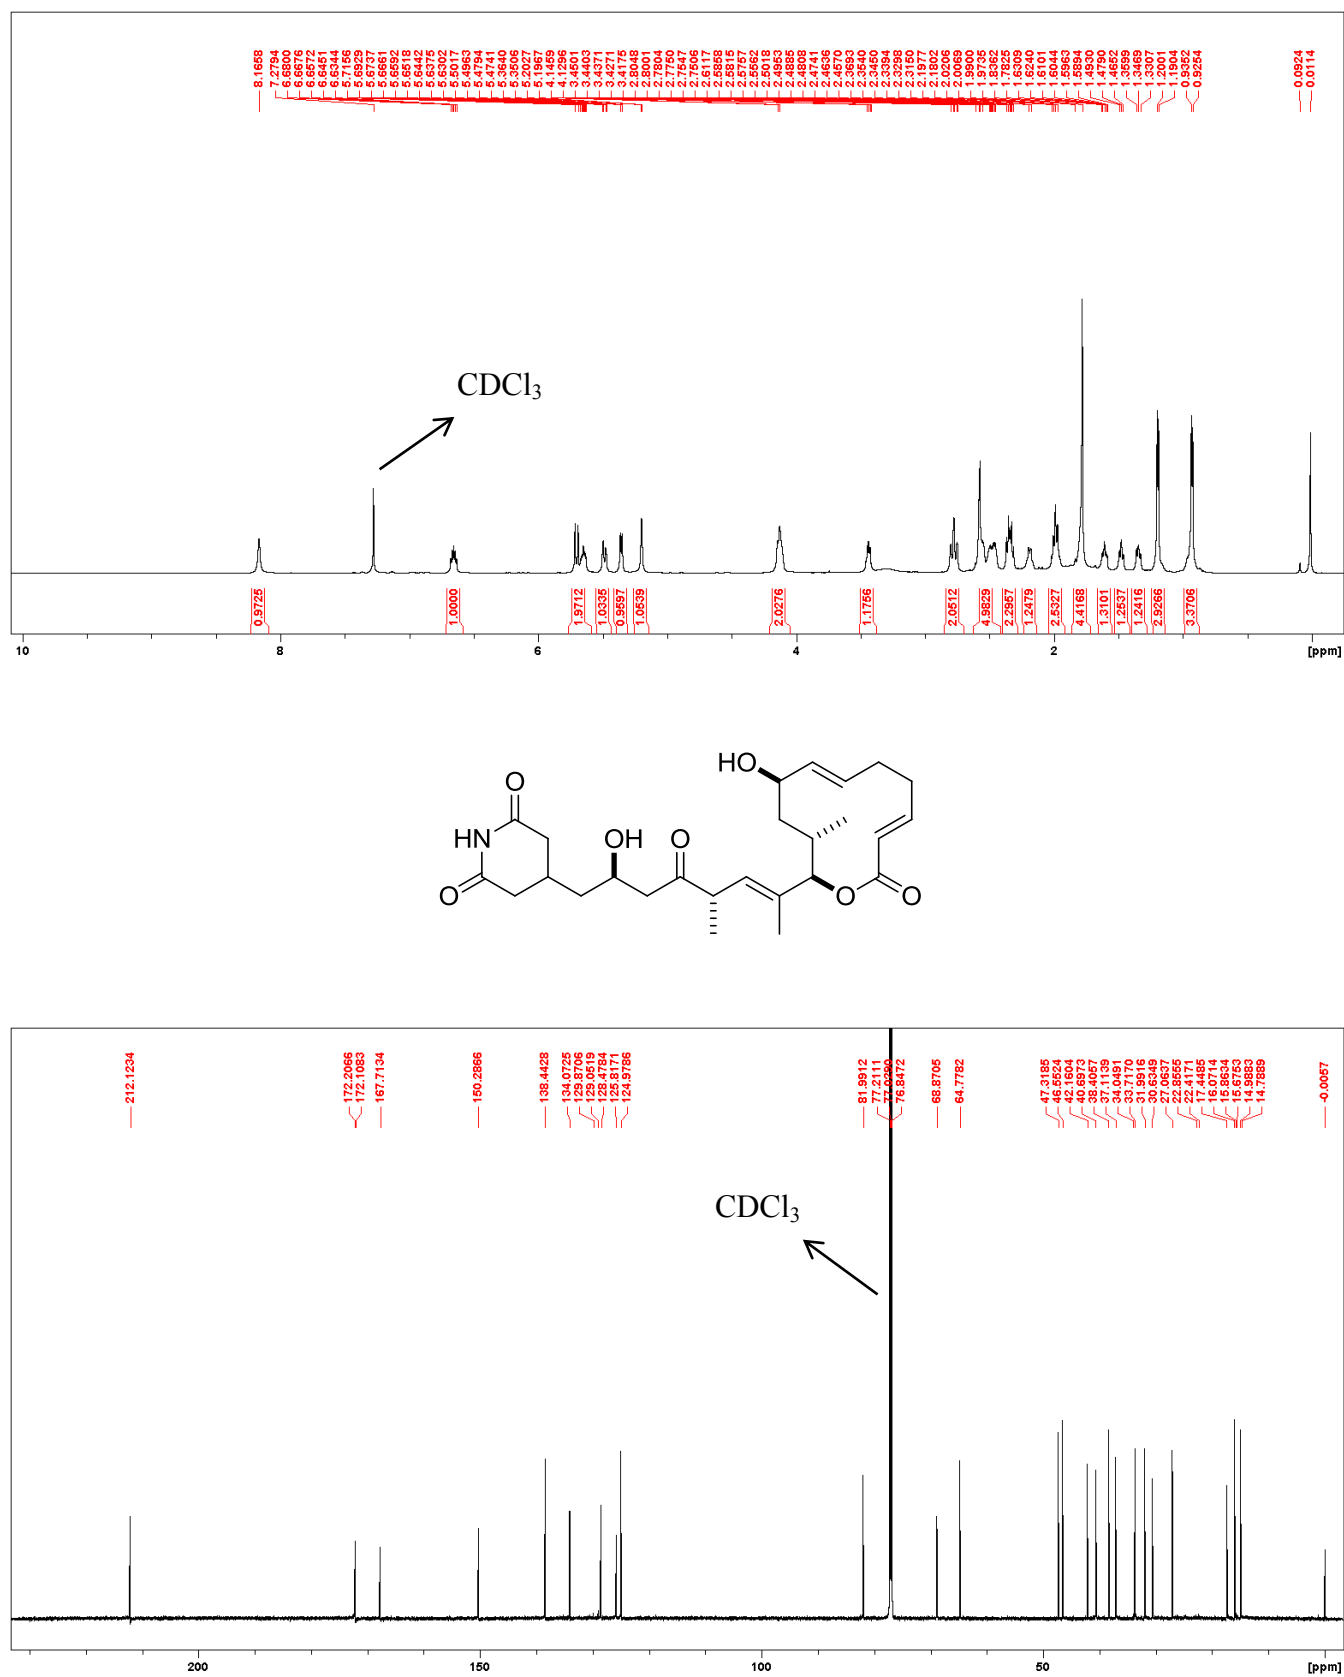

**Figure S8.** HSQC and HMBC spectra of 8,9-dihydro-8*R*-hydroxyl-LTM (**16**) in CDCl<sub>3</sub>

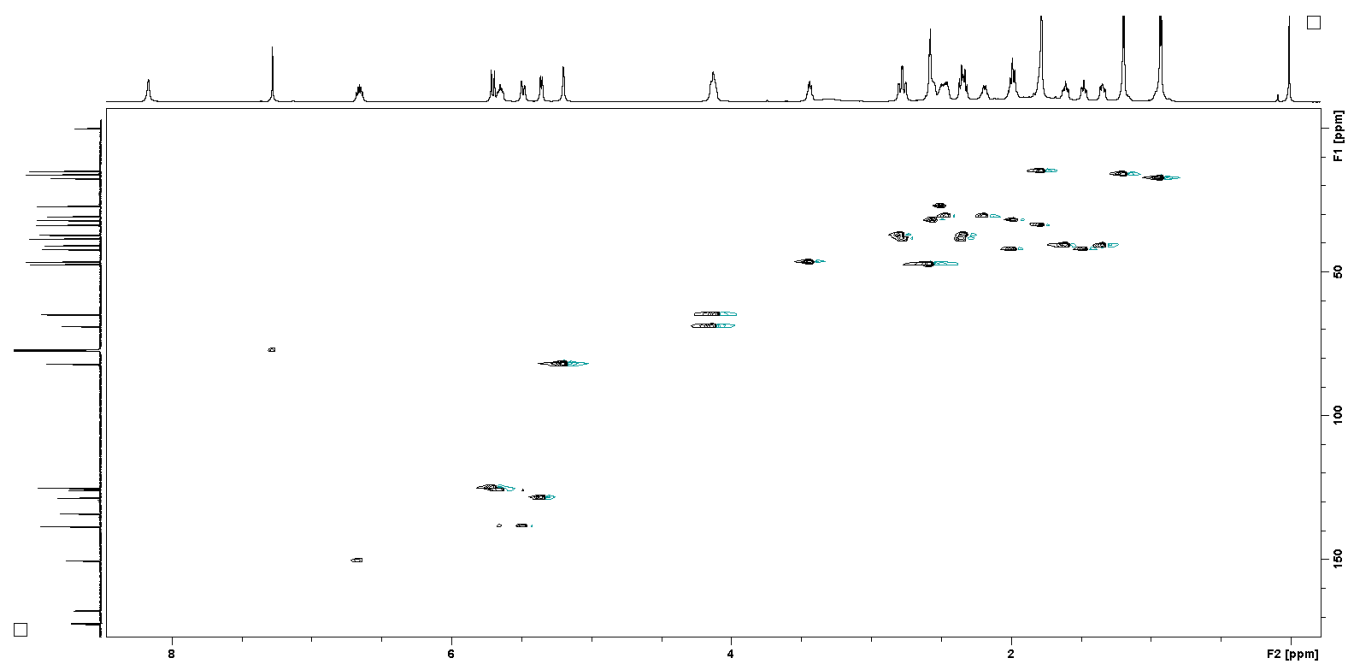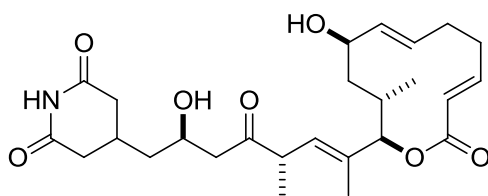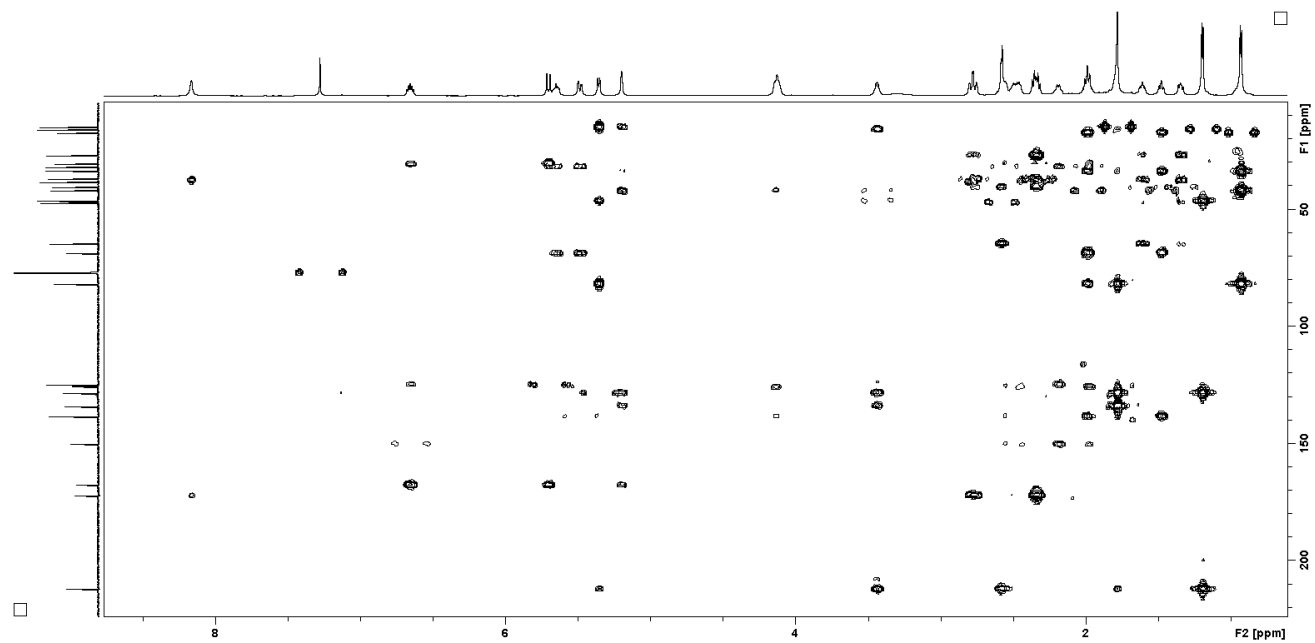

**Figure S9.**  $^1\text{H}$  (700 MHz) and  $^{13}\text{C}$  (175 MHz) NMR spectra of 8,9-dihydro-8*R*-methoxyl-LTM (**17**) in  $\text{CDCl}_3$

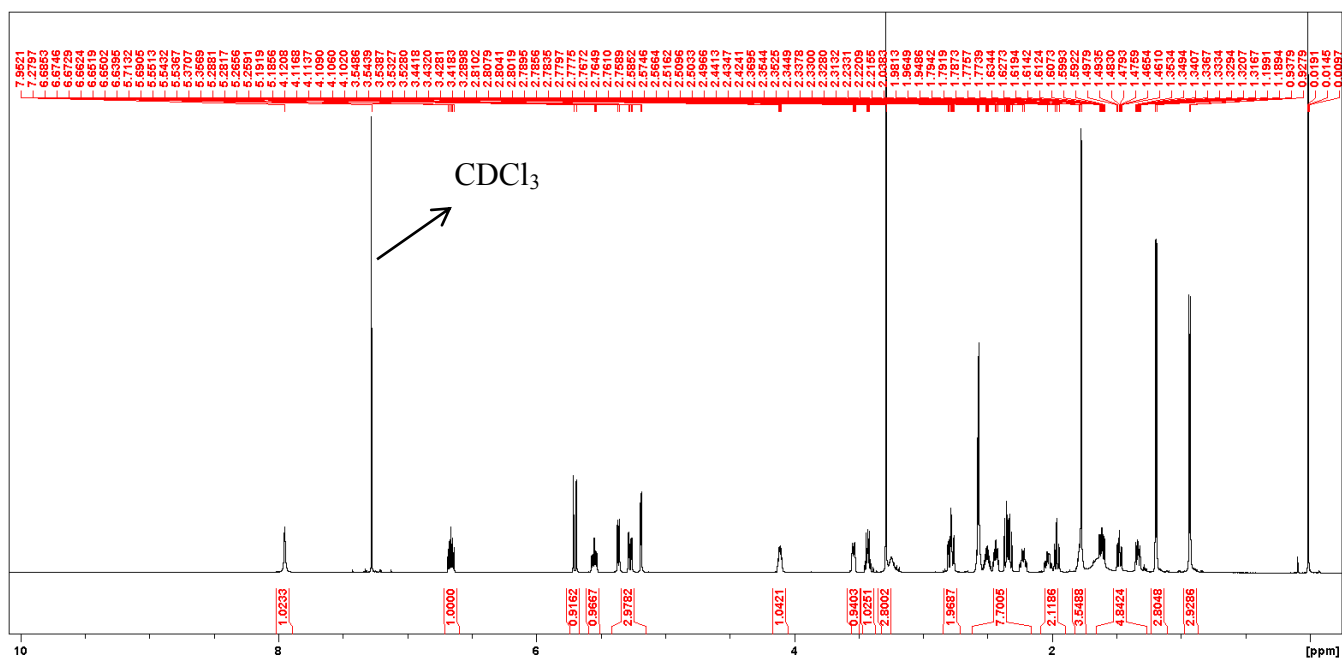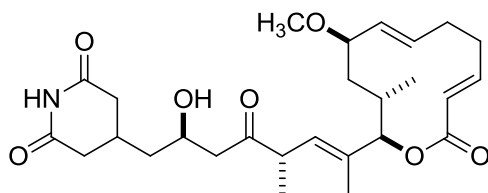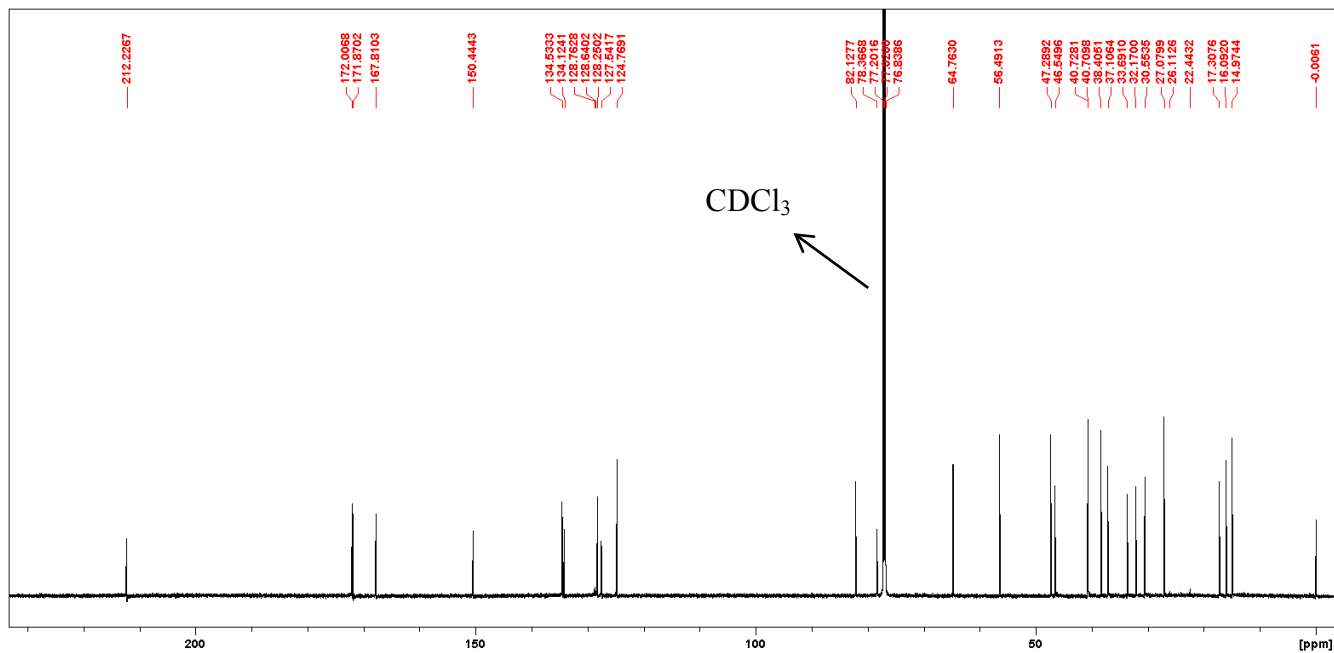

**Figure S10.** HSQC and HMBC spectra of 8,9-dihydro-8*R*-methoxyl-LTM (**17**) in CDCl<sub>3</sub>

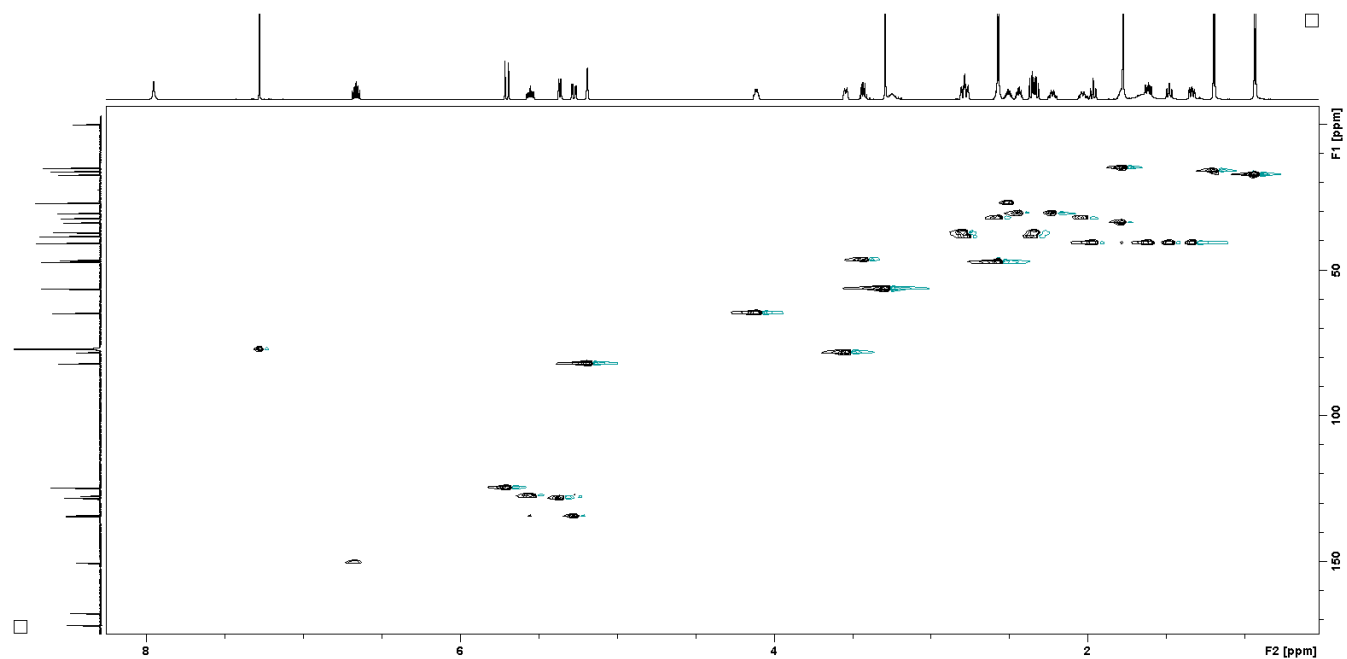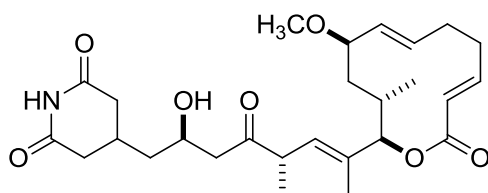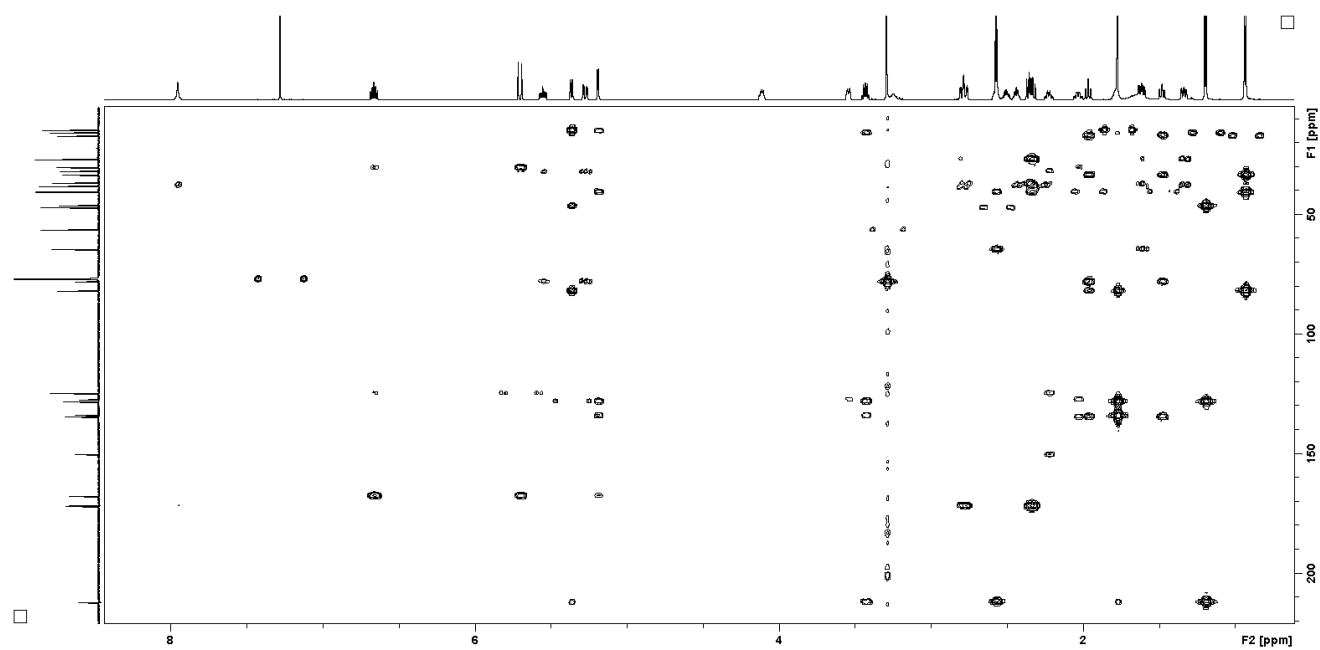

## Supporting References

- (1) Shen, B., and Hutchinson, C.R. (1996) Deciphering the mechanism for the assembly of aromatic polyketides by a bacterial polyketide synthase. *Proc. Natl. Acad. Sci. U.S.A.* 93, 6600-6604.
- (2) Sun, Y., Zhou, X., Liu, J., Bao, K., Zhang, G., Tu, G., Kieser, T., and Deng, Z. (2002) *Streptomyces nanchangensis*, a producer of the insecticidal polyether antibiotic nanchanmycin and the antiparasitic macrolide meilingmycin, contains multiple polyketide gene clusters. *Microbiology* 148, 361-371.
- (3) Gust, B., Challis, G. L., Fowler, K., Kieser, T., and Chater, K. F. (2003) PCR-targeted *Streptomyces* gene replacement identifies a protein domain needed for biosynthesis of the sesquiterpene soil odor geosmin. *Proc. Natl. Acad. Sci. U.S.A.* 100, 1541-1546.
- (4) Bierman, M., Logan, R., Obrien, K., Seno, E. T., Rao, R. N., and Schoner, B. E. (1992) Plasmid cloning vectors for the conjugal transfer of DNA from *Escherichia coli* to *Streptomyces* spp. *Gene* 116, 43-49.
- (5) Cheng, Y. Q., Tang, G. L., and Shen, B. (2003) Type I polyketide synthase requiring a discrete acyltransferase for polyketide biosynthesis. *Proc. Natl. Acad. Sci. U.S.A.* 100, 3149-3154.
- (6) Lim, S. K., Ju, J., Zazopoulos, E., Jiang, H., Seo, J. W., Chen, Y., Feng, Z., Rajski, S. R., Farnet, C. M., and Shen, B. (2009) iso-Migrastatin, migrastatin, and dorrigin production in *Streptomyces platensis* NRRL 18993 is governed by a single biosynthetic machinery featuring an acyltransferase-less type I polyketide synthase. *J. Biol. Chem.* 284, 29746-29756.
- (7) Ma, M., Kwong, T., Lim, S. K., Ju, J., Lohman, J. R., and Shen, B. (2013) Post-polyketide synthase steps in iso-migrastatin biosynthesis, featuring tailoring enzymes with broad substrate specificity. *J. Am. Chem. Soc.* 135, 2489-2492.
- (8) Sambrook, J. and Russell, D. (2001) *Molecular cloning: a laboratory manual*, 3rd ed., Cold Spring Harbor Laboratory Press, Cold Spring Harbor, New York, United States.
- (9) Kieser, T., Bibb, M. J., Buttner, M. J., Chater, K. F., and Hopwood, D. A. (2000) *Practical Streptomyces genetics*, John Innes Foundation, Norwich, United Kingdom.
- (10) Sugawara, K., Nishiyama, Y., Toda, S., Komiyama, N., Hatori, M., Moriyama, T., Sawada, Y., Kamei, H., Konishi, M., and Oki, T. (1992) Lactimidomycin, a new glutarimide group antibiotic. Production, isolation, structure and biological activity. *J. Antibiot.* 45, 1433-1441.
